# Supplementary material for: Real-time diagnostic accuracy of blue light imaging, linked color imaging and white-light endoscopy for colorectal polyp characterization
Source: PubMed Central journal article supplement — Endosc Int Open. 2022 Jan 14;10(1):E9–E18. doi: 10.1055/a-1594-1693 (PMC8759942; doi:10.1055/a-1594-1693), 2022-01-14
Supplement: 2384supmat_10-1055-a-1594-1693.pdf [file 2384supmat_10-1055-a-1594-1693.pdf]

## Supplementary material

## The WASP-classification for differentiation of colonic polyps using Narrow Band Imaging

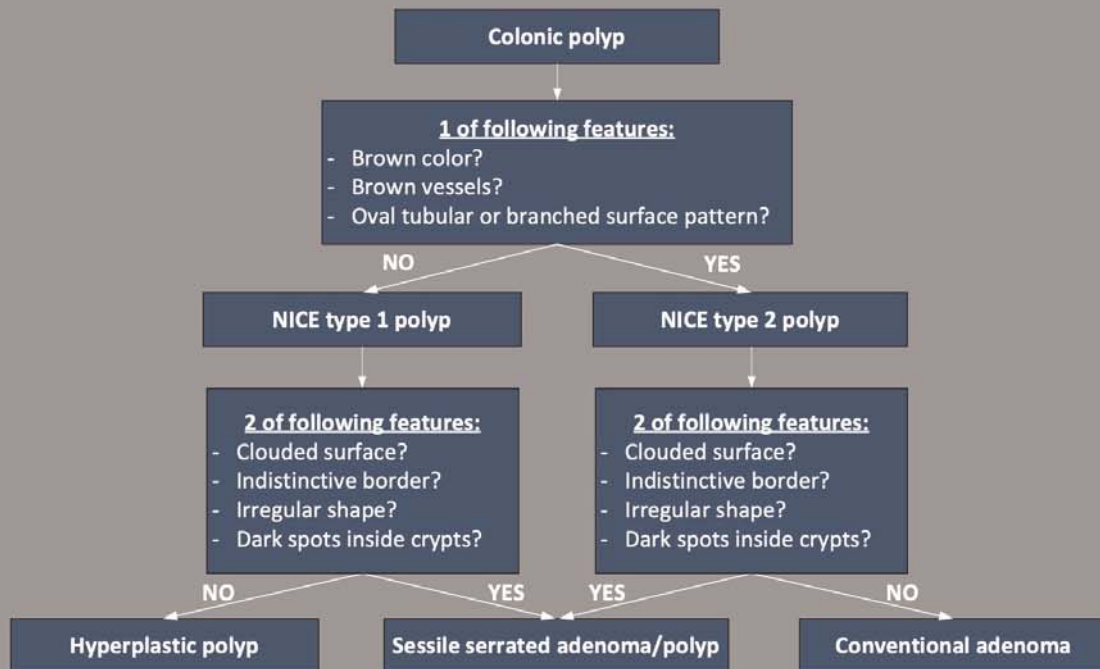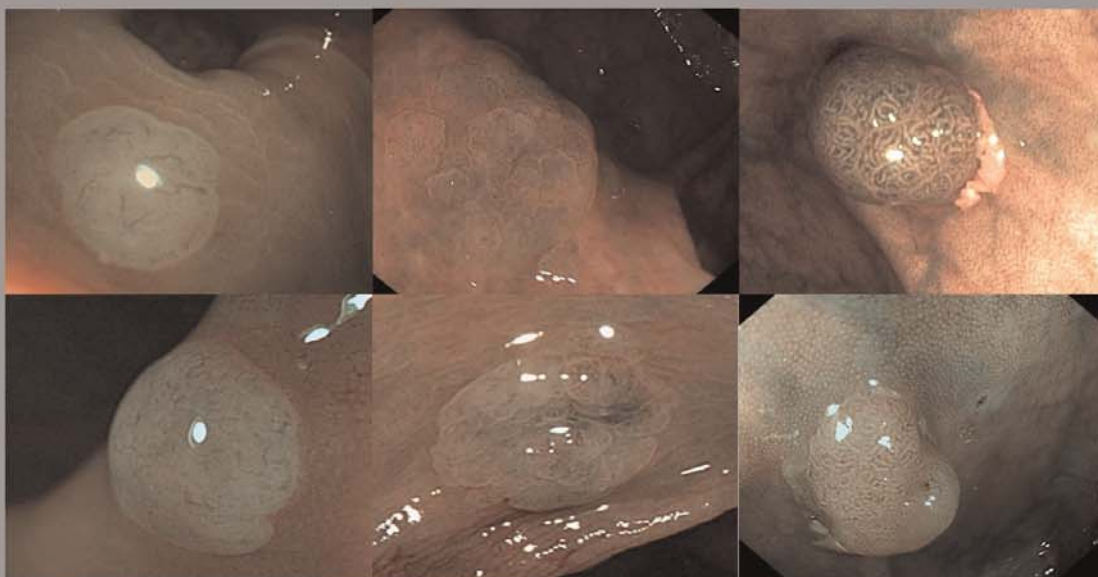

Designed by the Dutch workgroup serrated polyps &amp; polyposis

## Supplementary material

**Supplementary Table 1** Two-by-two table for endoscopic characterization with histopathology as reference standard.

|                                                                               | Histopathology |     |    |
|-------------------------------------------------------------------------------|----------------|-----|----|
|                                                                               | Adenoma        | SSL | HP |
| Endoscopic characterization all polyps, (N = 269)                             |                |     |    |
| Adenoma                                                                       | 132            | 4   | 10 |
| SSL                                                                           | 7              | 12  | 9  |
| HP                                                                            | 26             | 11  | 58 |
| Endoscopic characterization with high-confidence all polyps, (N = 223)        |                |     |    |
| Adenoma                                                                       | 118            | 2   | 8  |
| SSL                                                                           | 7              | 11  | 8  |
| HP                                                                            | 14             | 10  | 45 |
| Endoscopic characterization diminutive polyps, (N = 220)                      |                |     |    |
| Adenoma                                                                       | 108            | 1   | 10 |
| SSL                                                                           | 3              | 3   | 6  |
| HP                                                                            | 26             | 10  | 53 |
| Endoscopic characterization diminutive polyps with high-confidence, (N = 178) |                |     |    |
| Adenoma                                                                       | 94             | 0   | 8  |
| SSL                                                                           | 3              | 3   | 5  |
| HP                                                                            | 14             | 9   | 42 |

SSL, sessile serrated lesions; HP, hyperplastic polyps.
